# Supplementary material for: Ontogenetic propulsive transitions by medusaeSarsia tubulosa
Source: Oxford University Press journal article supplement (doi:10.1242/jeb.115832), 2015-01-01
Supplement: jeb115832supp.pdf [file jeb115832supp.pdf]

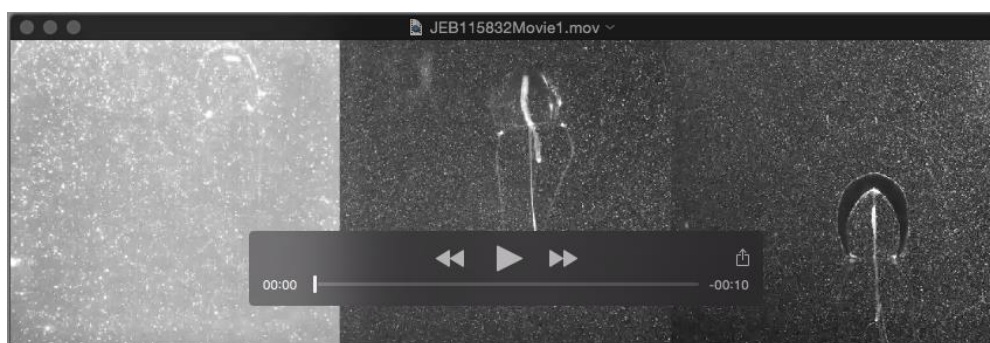

Movie 1. Particle images allow for evaluation of kinematics parameters across ontogeny. *Sarsia tubulosa* swimming behaviour for (L) 1 mm, (C), 4mm, and (R) 6 mm bell exit diameters, corresponding to 101121\_sarsia\_3, 110729\_sarsia\_17, and 120613\_6p5mm\_2 data sets, respectively.

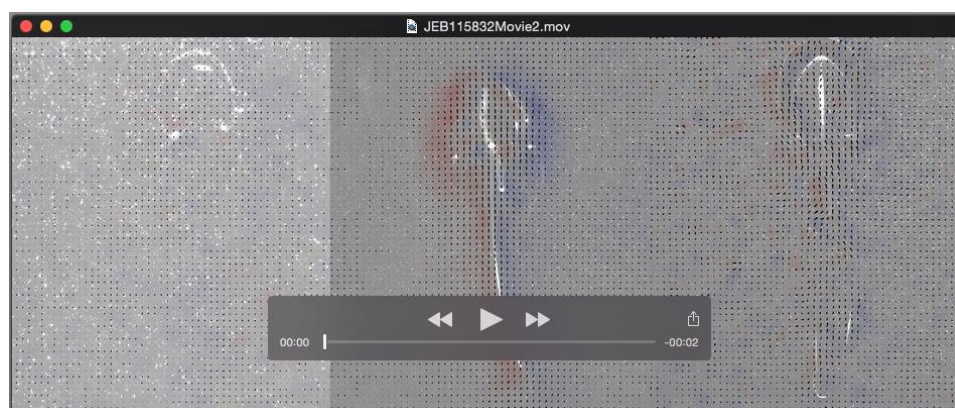

Movie 2. Velocity fields allow for evaluation of energetics parameters across ontogeny. *Sarsia tubulosa* propulsive wakes structures for (L) 1 mm, (C) 4 mm, and (R) 6 mm bell exit diameters, corresponding to 101121\_sarsia\_3, 110729\_sarsia\_17, and 120613\_6p5mm\_2 data sets, respectively.
